# Supplementary material for: Differential effects of BMP signaling on parvalbumin and somatostatin interneuron differentiation
Source: Oxford University Press journal article supplement (doi:10.1242/dev.034439), 2009-07-10
Supplement: dev034439-sup-034439-figs7.pdf [file dev034439-sup-034439-figs7.pdf]

*Olig1*<sup>cre/+</sup>

*R1a*<sup>fx/+</sup>; *R1b*<sup>+/-</sup>

*R1a*<sup>fx/-</sup>; *R1b*<sup>-/-</sup>

DAPI/SST

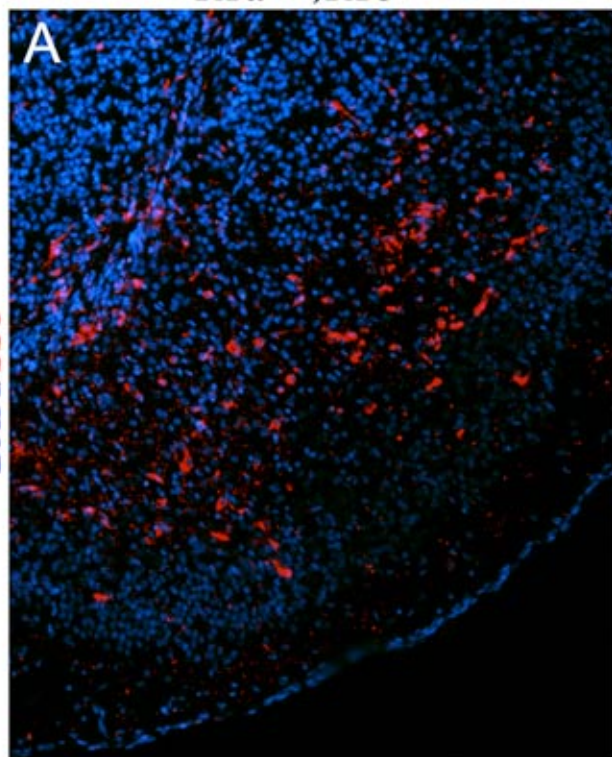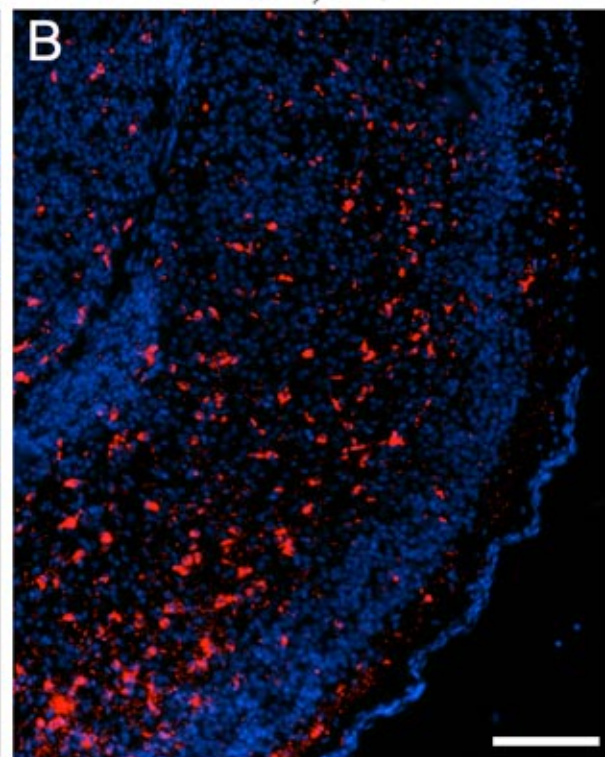

■ *Olig1*<sup>cre/+</sup>; *R1a*<sup>fx/+</sup>; *R1b*<sup>+/-</sup>  
■ *Olig1*<sup>cre/+</sup>; *R1a*<sup>fx/-</sup>; *R1b*<sup>-/-</sup>

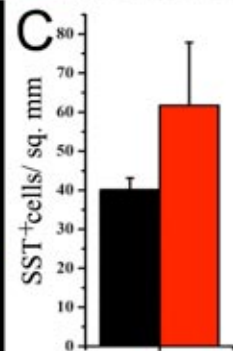

Cortex

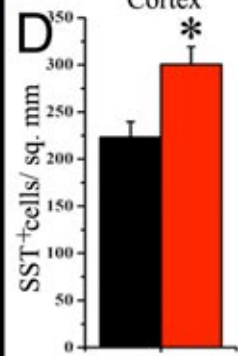

Piriform Area
