# Supplementary figures and images for: Differential effects of BMP signaling on parvalbumin and somatostatin interneuron differentiation
Source: Oxford University Press journal article supplement (doi:10.1242/dev.034439), 2009-07-10

Control

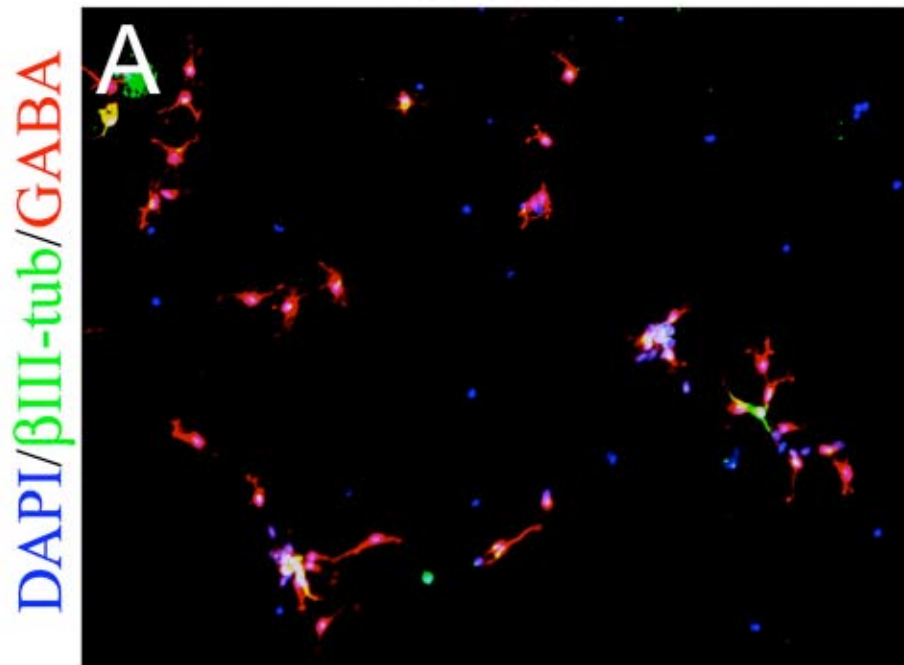

BMP4

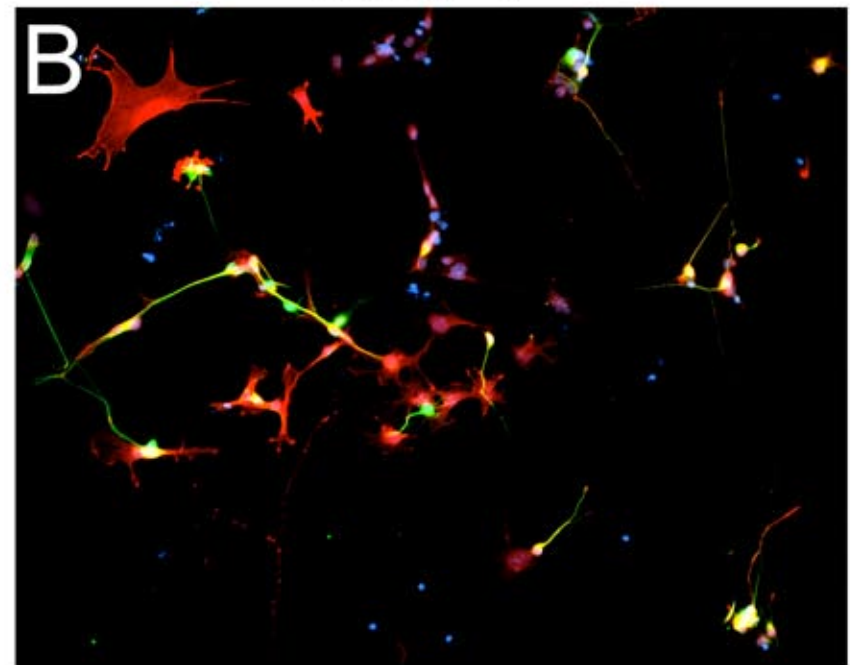

noggin

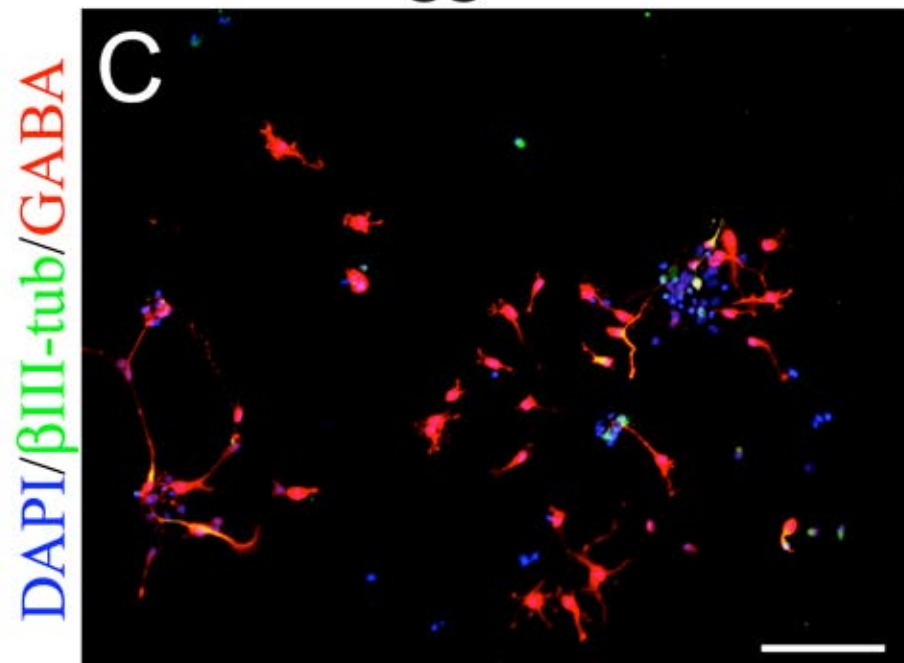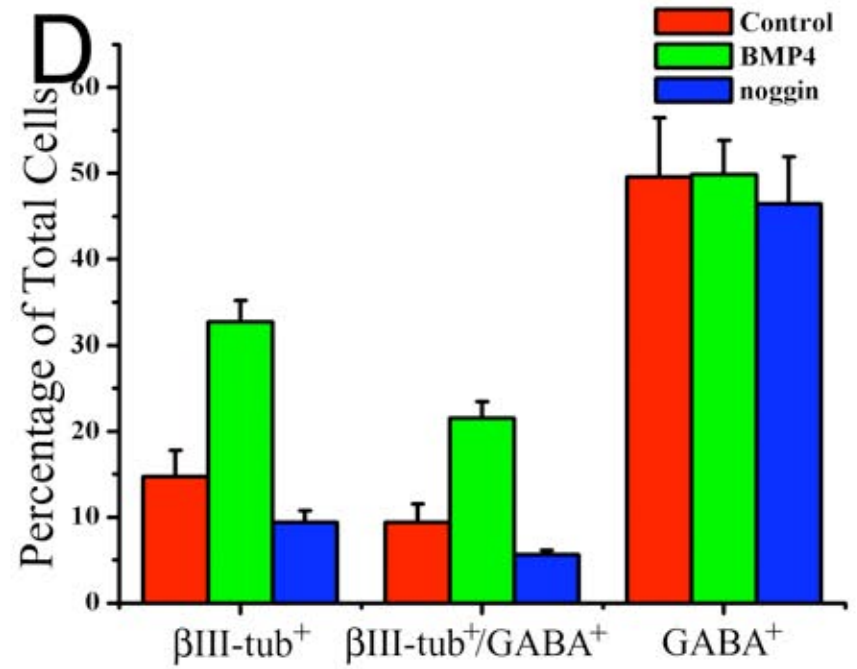

Supplement: dev034439-sup-034439-figs2.pdf [file dev034439-sup-034439-figs2.pdf]

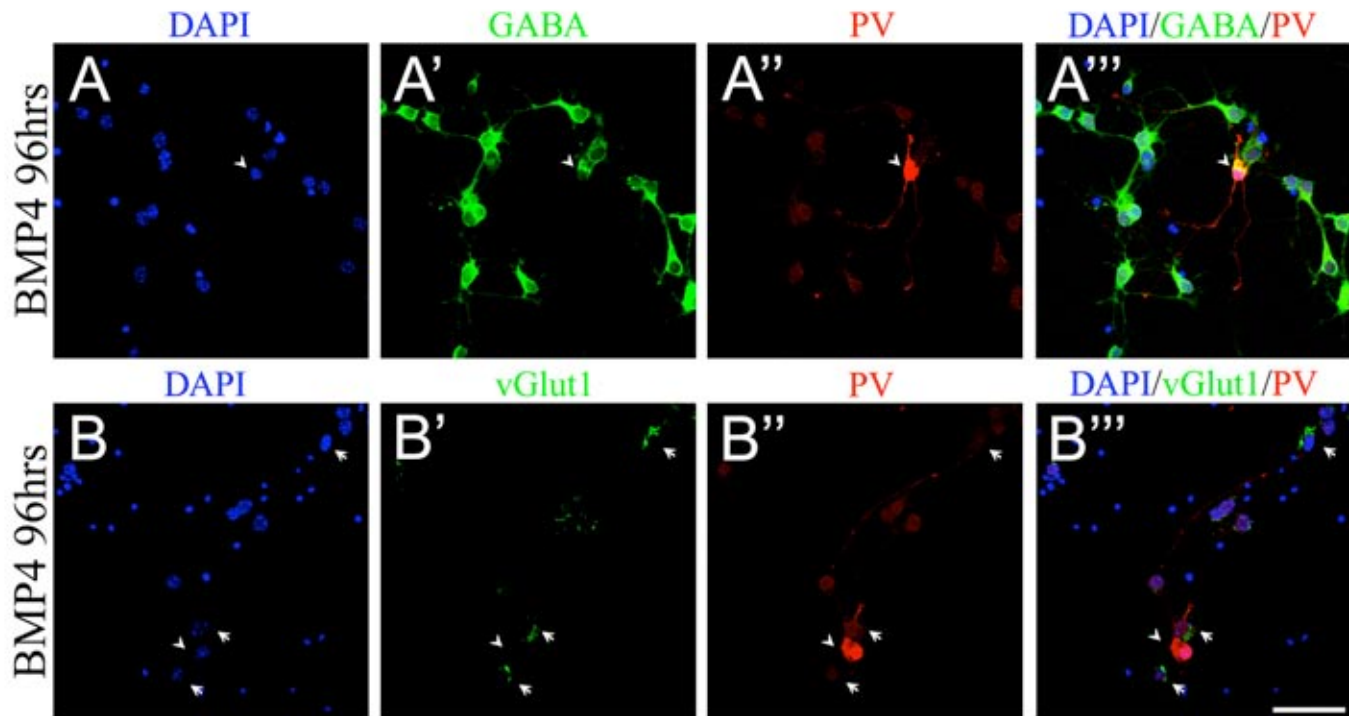

Supplement: dev034439-sup-034439-figs3.pdf [file dev034439-sup-034439-figs3.pdf]

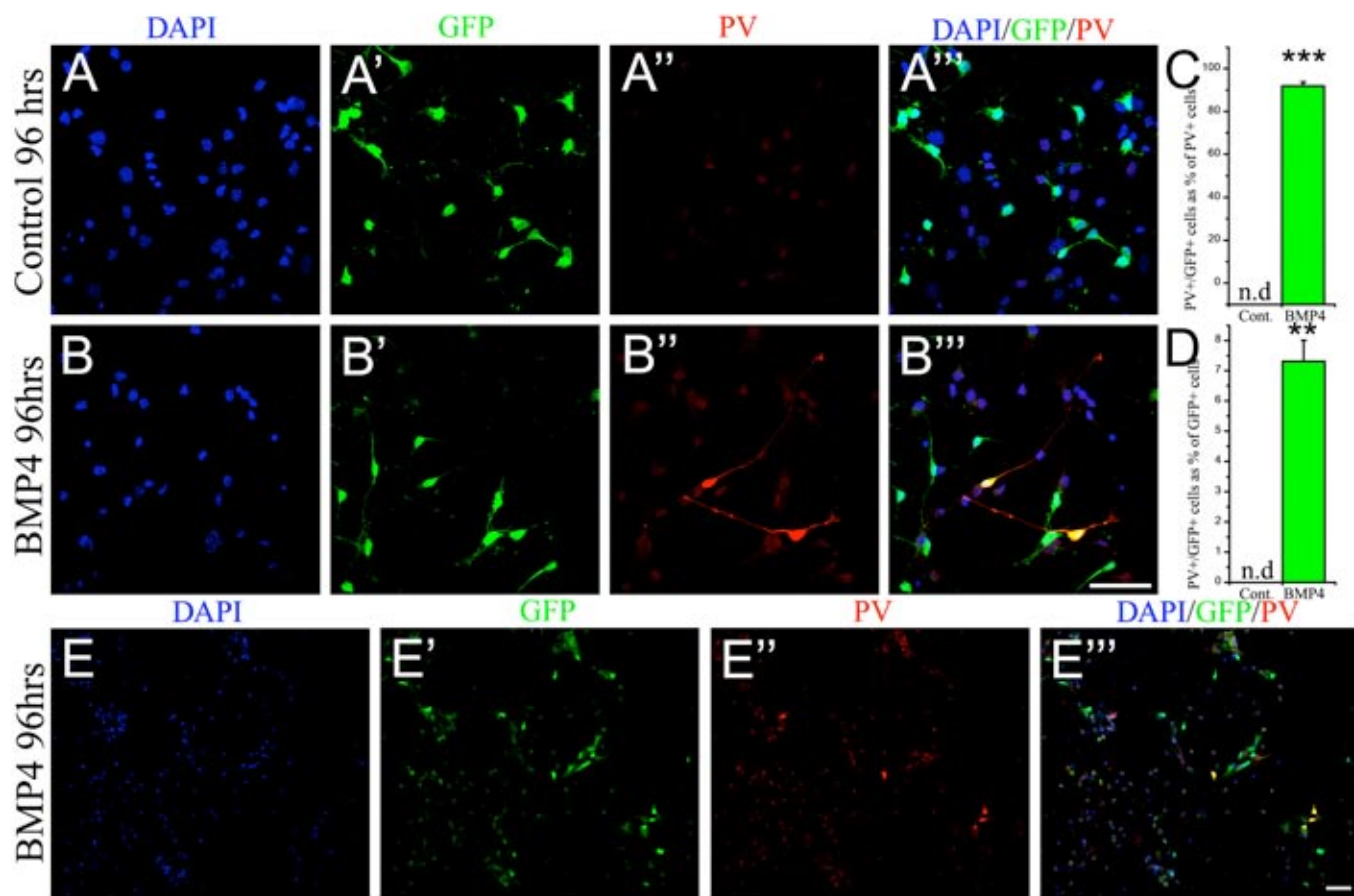

Supplement: dev034439-sup-034439-figs4.pdf [file dev034439-sup-034439-figs4.pdf]

E15.5

P1

Wild-Type

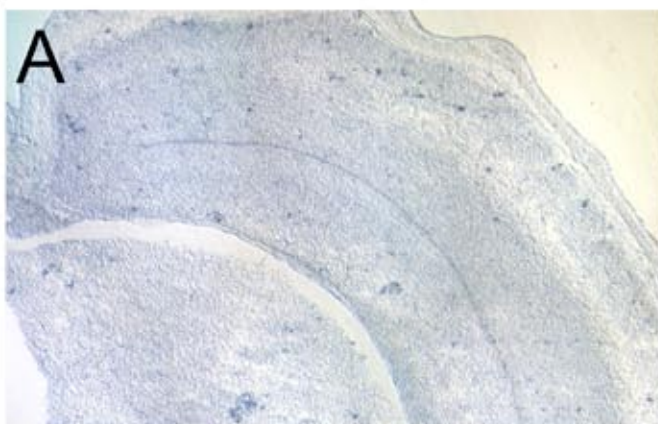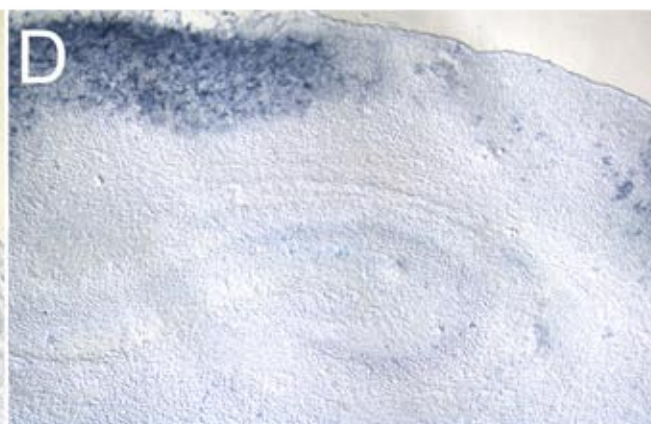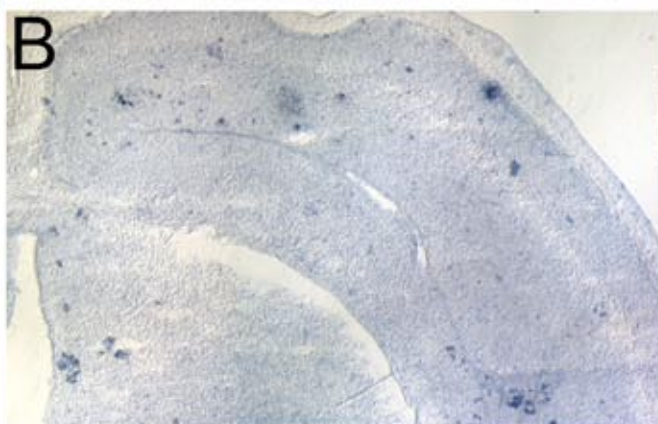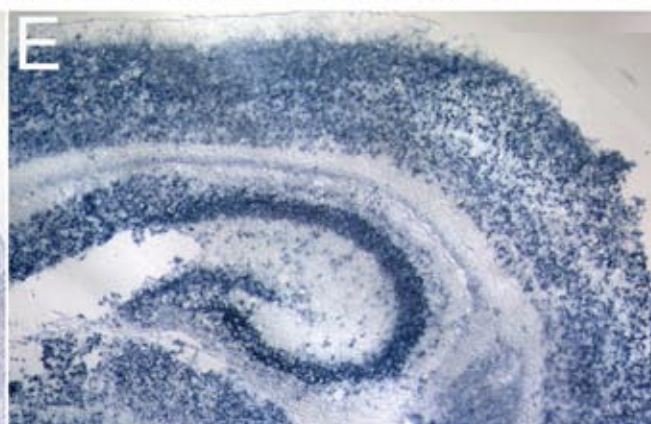

*Nse-Bmp4*

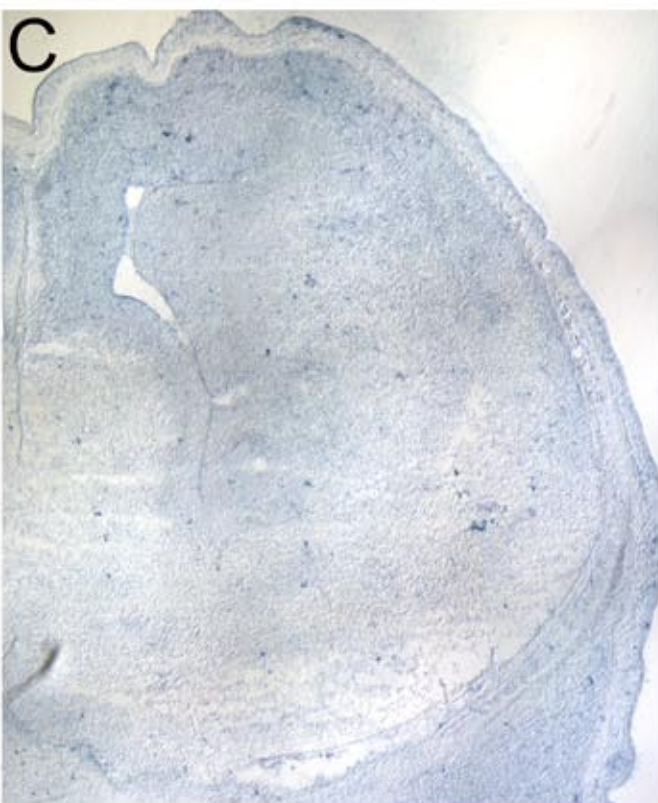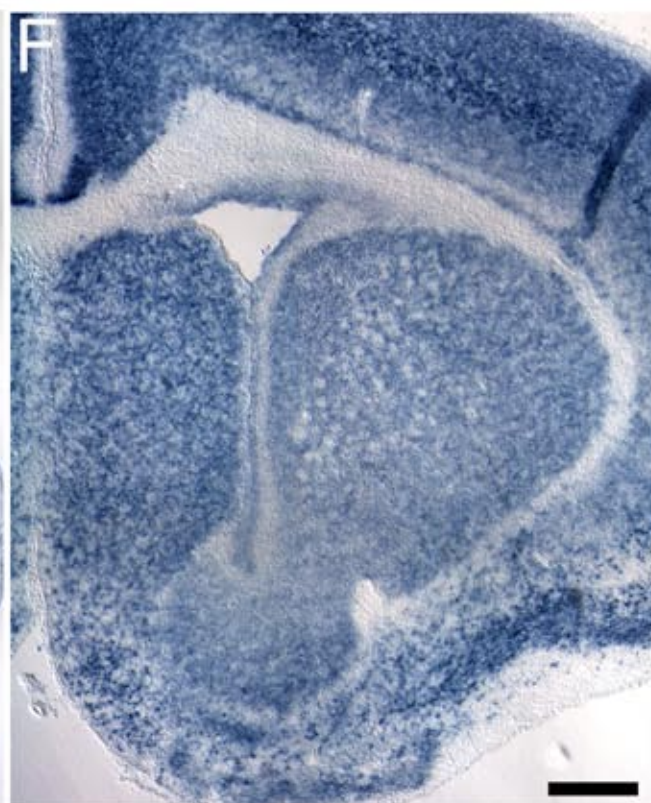

Supplement: dev034439-sup-034439-figs5.pdf [file dev034439-sup-034439-figs5.pdf]

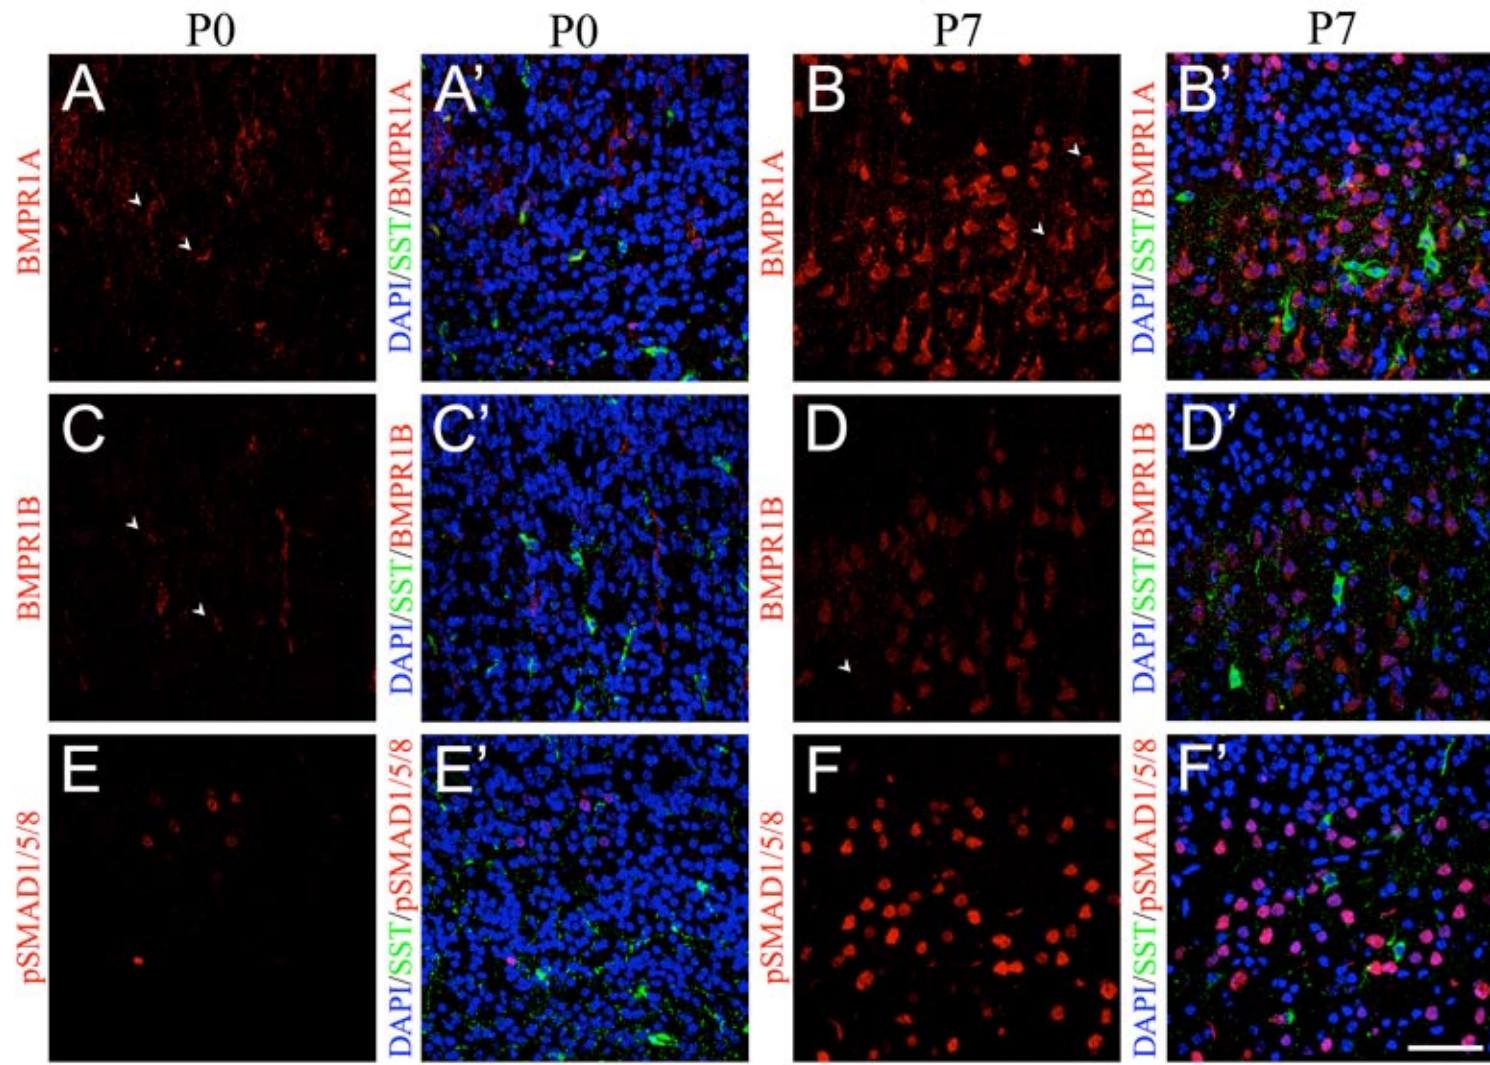

Supplement: dev034439-sup-034439-figs6.pdf [file dev034439-sup-034439-figs6.pdf]

*Olig1*<sup>cre/+</sup>

*R1a*<sup>fx/+</sup>; *R1b*<sup>+/-</sup>

*R1a*<sup>fx/-</sup>; *R1b*<sup>-/-</sup>

A

B

DAPI/GABA

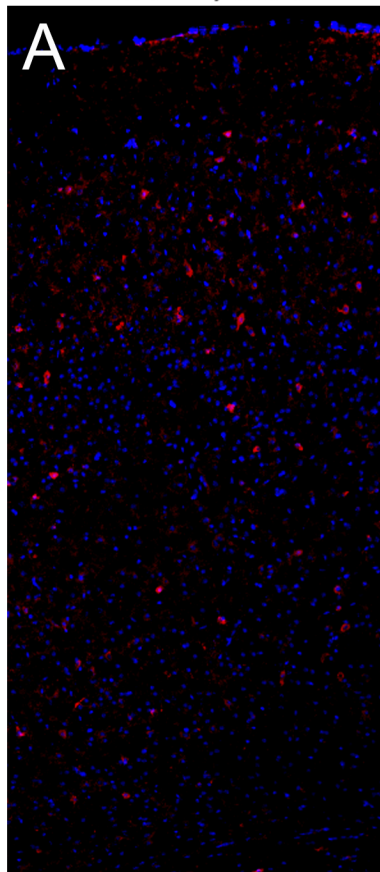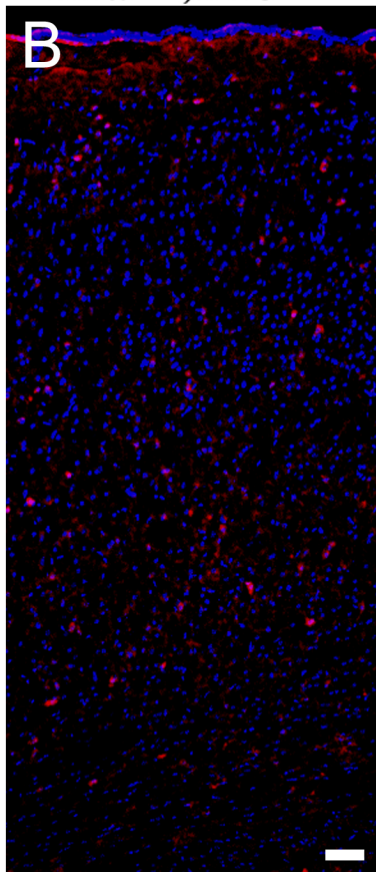

Supplement: dev034439-sup-034439-figs8.pdf [file dev034439-sup-034439-figs8.pdf]
